# Supplementary material for: Phenome-wide heritability analysis of the UK Biobank
Source: PLoS Genet. 2017 Apr 7;13(4):e1006711. doi: 10.1371/journal.pgen.1006711 (PMC5400281; doi:10.1371/journal.pgen.1006711)
Supplement: S4 Table — (XLSX) [file pgen.1006711.s005.xlsx]

## Sheet: Sheet1
Trait Domain	Category ID	Category Name	Field ID	Field Name	Type	Notes	Covariates	N	Prevalence	h2	SE	h2 (no MHC)	SE (no MHC)
Self-reported Non-cancer Illness Code	100074	Medical conditions	20002	Psoriasis	binary		assessment center, age, sex, top 10 PCs, genotyping array	108148	0.0114843	1	0.0471044	0.16	0.0574
Health and Medical History	100044	Medical conditions	2976	Age diabetes diagnosed	continuous		assessment center, age, sex, top 10 PCs, genotyping array	5369	NA	1	0.0736156	0.1871	0.0897
Self-reported Non-cancer Illness Code	100074	Medical conditions	20002	Rheumatoid arthritis	binary		assessment center, age, sex, top 10 PCs, genotyping array	108148	0.0118079	0.820992	0.0461352	0.1465	0.0562
Life Style and Environment	100052	Diet	6144	Never eat eggs, dairy, wheat, sugar	categorical	never eat wheat products or not	assessment center, age, sex, top 10 PCs, genotyping array	107832	0.0267546	0.691187	0.0255899	0.0851204	0.0312033
Self-reported Non-cancer Illness Code	100074	Medical conditions	20002	Thyroid problem (not cancer)	binary		assessment center, age, sex, top 10 PCs, genotyping array	108148	0.0576802	0.875894	0.0152834	0.3413	0.0186
Self-reported Non-cancer Illness Code	100074	Medical conditions	20002	Hypothyroidism/Myxoedema	binary		assessment center, age, sex, top 10 PCs, genotyping array	108148	0.0482672	0.814139	0.0171367	0.3876	0.0209
Health and Medical History	100041	Eyesight	6148	Eye problems/disorders	categorical	had diabetes related eye disease or not	assessment center, age, sex, top 10 PCs, genotyping array	33750	0.0204148	0.721899	0.0966505	0.3397	0.1175
ICD10 Code	2022	Summary Information (diagnoses)	41202	K90-K93 Other diseases of the digestive system	binary		assessment center, age, sex, top 10 PCs, genotyping array	71743	0.0157088	0.361332	0.0555154	0.0197	0.0674
Self-reported Non-cancer Illness Code	100074	Medical conditions	20002	Endocrine/Diabetes	binary		assessment center, age, sex, top 10 PCs, genotyping array	108148	0.106965	0.537188	0.0105493	0.2402	0.0129
ICD10 Code	2022	Summary Information (diagnoses)	41202	R31 Unspecified haematuria	binary		assessment center, age, sex, top 10 PCs, genotyping array	71743	0.0351951	0.272691	0.031414	0	0.0382
Self-reported Non-cancer Illness Code	100074	Medical conditions	20002	Dermatology	binary		assessment center, age, sex, top 10 PCs, genotyping array	108148	0.042673	0.368456	0.0185793	0.1033	0.0227
